# Supplementary material
Source: MDPI journal article supplement (https://www.mdpi.com/2073-4441/15/19/3348)
Supplement: s1 [file s1]

## Supplementary Materials:

**Supplementary Table S1.** Removal efficiency of organic and nutrients from domestic wastewater by using VFCWs.

| Parameter                                                                                                             | Substrate        | Plants                                                                                               | Removal efficiency %                                                                                                                                                                                                                                                                                      | Comments                                                                                                                                                                                                                                                                                         | Climatic Conditions              | Ref. |
|-----------------------------------------------------------------------------------------------------------------------|------------------|------------------------------------------------------------------------------------------------------|-----------------------------------------------------------------------------------------------------------------------------------------------------------------------------------------------------------------------------------------------------------------------------------------------------------|--------------------------------------------------------------------------------------------------------------------------------------------------------------------------------------------------------------------------------------------------------------------------------------------------|----------------------------------|------|
| BOD <sub>5</sub><br>COD<br>Nitrate<br>Phosphate                                                                       | •Gravel<br>•Soil | • <i>Iris pseudacorus</i><br>• <i>Echinodorus palaefolius</i><br>•Combination between the two plants | <ul style="list-style-type: none"> <li>•For the system with <i>Iris pseudacorus</i>: 30, 19, 51, and 87, respectively.</li> <li>•For the system with <i>Echinodorus palaefolius</i>: -40, 28, 58, and 99, respectively.</li> <li>•For the combination system: 6, 51, 46, and 95, respectively.</li> </ul> | <ul style="list-style-type: none"> <li>➤ No significant difference between using one plant species or a combination of species in enhancing the treatment efficiency.</li> <li>➤ All experiments in this study show better performance in removing nutrients than organic pollutants.</li> </ul> | Avg. Temp.: N.A<br>Humidity: N.A | [64] |
| BOD <sub>5</sub><br>COD<br>TSS<br>Ammonia-N<br>TN<br>TP<br><i>coliform</i> bacteria<br>Fecal <i>coliform</i> bacteria | Coarse sand      | • <i>Phragmites australis</i><br>• <i>Glyceria aquatica</i> L                                        | <ul style="list-style-type: none"> <li>•For the system with <i>Phragmites australis</i>: 96, 96, 91, 88, 55, 87, ~100, and 98, respectively.</li> <li>•For the system with <i>Glyceria aquatica</i> L: 98, 94, 93, 86, 54, 88, ~100, and 98, respectively.</li> </ul>                                     | <ul style="list-style-type: none"> <li>➤ There were no significant differences in removal efficiency between plant species.</li> </ul>                                                                                                                                                           | Avg. Temp.: N.A<br>Humidity: N.A | [66] |

| BOD<br>COD<br>TSS<br>Ammonia-N<br>TP | Coal slag            | <i>Cyperus alternifolius</i> | 60, 64, 80, 50, and 40, respectively. | <p>➤ The analysis results indicate that the temperature has negligible treatment effects on COD, TP, and TSS removal efficiencies.</p> <p>➤ Ammonia-N removal efficacy was affected by seasonal temperature changes.</p> | Avg. Temp.: 20.7°C              | [88] |
|--------------------------------------|----------------------|------------------------------|---------------------------------------|--------------------------------------------------------------------------------------------------------------------------------------------------------------------------------------------------------------------------|---------------------------------|------|
| BOD<br>COD<br>Ammonia-N<br>TKN<br>TP | Zeolite              | <i>Phragmites australis</i>  | 96, 94, 93, 91, and 70, respectively  | <p>➤ High removal efficiency for nitrogen mostly refers to the used media (zeolite).</p> <p>➤ Vegetation has a positive impact on increasing the removal percentage of organic pollutants and nutrients.</p>             | Avg.Temp.: N.A<br>Humidity: N.A | [91] |
| Sup Table S1 (cor                    |                      |                              |                                       |                                                                                                                                                                                                                          |                                 |      |
| Parameter                            | Substrate            | Plants                       | Removal efficiency %                  | Comments                                                                                                                                                                                                                 | Climatic Conditions             | Ref. |
| TN<br>TP                             | •Midsized artificial | <i>Canna indica</i> L.       | •For MSAS-based system:               | ➤ Existing plants in the system enhance the                                                                                                                                                                              | Avg. Temp: N.A<br>Humidity: N.A | [72] |

|                                              |                                                                                                                                                                |                              |                                                                                                                                                                                                   |                                                                                                                                                                                                                  |                                          |
|----------------------------------------------|----------------------------------------------------------------------------------------------------------------------------------------------------------------|------------------------------|---------------------------------------------------------------------------------------------------------------------------------------------------------------------------------------------------|------------------------------------------------------------------------------------------------------------------------------------------------------------------------------------------------------------------|------------------------------------------|
|                                              | <ul style="list-style-type: none"> <li>sand slag (MSAS).</li> <li>•Coal burn artificial slag (CBAS).</li> <li>•Blast furnace artificial slag (BFAS)</li> </ul> |                              | <ul style="list-style-type: none"> <li>24 and 45, respectively.</li> <li>•For CBAS-based system: 30 and 60, respectively.</li> <li>•For BFAS-based system: 22 and 89, respectively.</li> </ul>    | removal efficiency for the nutrient compared to the unplanted system.                                                                                                                                            |                                          |
| BOD <sub>5</sub><br>COD<br>TSS<br>Ammonium-N | <ul style="list-style-type: none"> <li>•Fine sand</li> <li>•Gravel</li> </ul>                                                                                  | <i>Heliconia psittacorum</i> | <ul style="list-style-type: none"> <li>•For planted sand-based systems: 97, 92, 87, and 83, respectively.</li> <li>•For planted Gravel-based systems: 52, 59, 0, and 45, respectively.</li> </ul> | <ul style="list-style-type: none"> <li>➤ Using fine sand as filter media improves the removal of organic pollutants and ammonia- N.</li> <li>➤ Enhancing the TN removal by the presence of the plant.</li> </ul> | Avg. Temp.: 20.7°C<br>Humidity: 81% [56] |
| COD<br>TSS<br>Ammonium-N<br>TN<br>TP         | <ul style="list-style-type: none"> <li>•Blast furnace granulated slag with gravel and sand.</li> <li>•Gravel and sand of different sizes</li> </ul>            | <i>Phragmites australis</i>  | <ul style="list-style-type: none"> <li>•For slag-based system: 49, 64, 88, 41, and 63, respectively.</li> <li>•For gravel-based systems: 40, 62, 58, 44, and 9, respectively</li> </ul>           | <ul style="list-style-type: none"> <li>➤ Better efficient in removal with slag beds than with gravels.</li> </ul>                                                                                                | Avg. Temp.: N.A<br>Humidity: N.A [73]    |

| COD<br>TKN                    | Fine sand<br>Gravel                                                                         | <ul style="list-style-type: none"> <li>•<i>Cyperus alternifolius</i></li> <li>•<i>Vetiveria zizanioides</i></li> </ul> | <ul style="list-style-type: none"> <li>•For the system with <i>Cyperus alternifolius</i>: 76 and 65, respectively.</li> <li>•For the system with <i>Vetiveria zizanioides</i>: 67 and 56, respectively.</li> </ul> | ➤ Different HLR has been studied, the lowest one 20 cm/d achieved the maximum treatment efficiency.                                  | Avg. Temp.: 27 °C<br>Humidity: N.A                                     | [62] |
|-------------------------------|---------------------------------------------------------------------------------------------|------------------------------------------------------------------------------------------------------------------------|--------------------------------------------------------------------------------------------------------------------------------------------------------------------------------------------------------------------|--------------------------------------------------------------------------------------------------------------------------------------|------------------------------------------------------------------------|------|
| OP<br>Ammonium-N<br>TN        | Gravel                                                                                      | <i>Phragmites australis</i>                                                                                            | 96, 98, and 85, respectively.                                                                                                                                                                                      | ➤ Intermittent aeration increases the treatment efficiencies for organic and nitrogen pollutants.                                    | Avg. Temp.:14.7 °C<br>Humidity: Sub-humid continental monsoon climate. | [71] |
| COD<br>Ammonium-N<br>TN       | <ul style="list-style-type: none"> <li>•Gravel</li> <li>•Washed sand</li> </ul>             | <i>Oenanthhe javanica</i>                                                                                              | 95, 99, and 53, respectively.                                                                                                                                                                                      |                                                                                                                                      | Avg. Temp.: 19°C<br>Humidity: N.A                                      | [70] |
| Sup Table S1 (cor             |                                                                                             |                                                                                                                        |                                                                                                                                                                                                                    |                                                                                                                                      |                                                                        |      |
| Parameter                     | Substrate                                                                                   | Plants                                                                                                                 | Removal efficiency %                                                                                                                                                                                               | Comments                                                                                                                             | Climatic Conditions                                                    | Ref. |
| BOD<br>COD<br>TSS<br>TN<br>TP | <ul style="list-style-type: none"> <li>•Gravel with various sizes</li> <li>•Sand</li> </ul> | <ul style="list-style-type: none"> <li>•<i>Typha latifolia</i></li> <li>•<i>Phragmites australis</i></li> </ul>        | Average removal percentage: 80, 79, 59, 73, and 63, respectively.                                                                                                                                                  | ➤ The treated water still needed measurements for heavy metals and microbial to decide if it could be able to reused for irrigation. | Avg. Temp.: N.A<br>Humidity: N.A                                       | [69] |

|           |        |                               |                                 |                                                                                                                                 |                    |
|-----------|--------|-------------------------------|---------------------------------|---------------------------------------------------------------------------------------------------------------------------------|--------------------|
| BOD       |        |                               |                                 | ➤ The system is effective for household wastewater and adjusts with national regulations for treated water reuse in irrigation. |                    |
| COD       |        | • <i>Canna</i>                | Average removal percentage: 90, |                                                                                                                                 | Avg. Temp.: N.A    |
| TSS       | Gravel | • <i>Phragmites australis</i> | 88, 92, 53, 57,                 |                                                                                                                                 | Humidity: N.A [68] |
| TKN       |        | • <i>Cyperus papyrus</i>      | and 62, respectively.           |                                                                                                                                 |                    |
| Ammonia-N |        |                               |                                 |                                                                                                                                 |                    |
| Phosphate |        |                               |                                 |                                                                                                                                 |                    |

BOD<sub>5</sub>; five-day Biochemical Oxygen Demand / COD; Chemical Oxygen Demand / TSS; Total Solid Suspend / TN; Total Nitrogen / TP; Total Phosphorus / TKN; Total Kjeldahl Nitrogen / HLR; Hydraulic Loading Rates / OP; Organic Pollutants/ Avg. Temp.; Average Temperature/ N.A; Not Available

**Supplementary Table S2:** HCW and their removal efficiency for different pollutants from domestic wastewater.

| Parameter        | HCW type                 | Substrate                                                                                                  | Removal efficiency %                                                       | Comments                                                                                                                   | Ref. |
|------------------|--------------------------|------------------------------------------------------------------------------------------------------------|----------------------------------------------------------------------------|----------------------------------------------------------------------------------------------------------------------------|------|
| BOD <sub>5</sub> | • HCW:                   | From bottom to top:                                                                                        |                                                                            | ➤ The removal of nitrate-nitrogen, TP, TKN, and heavy metals was more efficient in the systems with more substrate layers. | [15] |
| COD              | with 4                   | • HCW: coarse gravel, medium gravel, filtration sand, and woodchips.                                       | • HCW system: 36, 77, 76, 64, 35, 25, 20, 60, 45, and 25, respectively.    |                                                                                                                            |      |
| TSS              | substrate layers.        |                                                                                                            | • MHCW-1 system: 54, 77, 76, 62, 33, 34, 27, 77, 73, and 38, respectively. |                                                                                                                            |      |
| Ammonium-N       | • Modified HCW (MHCW-1): | • MHCW-1 & MHCW-2: coarse gravel, medium gravel, filtration sand, coarse gravel, medium gravel, filtration | • MHCW-2 system: 71, 79, 80, 64, 42, 41, 33, 80, 72, and 38, respectively. | ➤ Removal percentages of BOD <sub>5</sub> , TSS, and Cu have achieved maximum value with the MHCW-2 system                 |      |
| Nitrate- N       | with seven               |                                                                                                            |                                                                            |                                                                                                                            |      |
| TKN              | substrate layers.        |                                                                                                            |                                                                            |                                                                                                                            |      |
| TP               | • Modified HCW (MHCW-2): |                                                                                                            |                                                                            |                                                                                                                            |      |
| Cu               | with seven               |                                                                                                            |                                                                            |                                                                                                                            |      |
| Pb               | substrate layers.        |                                                                                                            |                                                                            |                                                                                                                            |      |
| Cr               | Modified HCW (MHCW-2):   |                                                                                                            |                                                                            |                                                                                                                            |      |
|                  | with seven               |                                                                                                            |                                                                            |                                                                                                                            |      |

substrate layers  
and  
earthworm.  
  
sand, and  
woodchips.

Sup Table S2 (cont.)

| Parameter                                                                               | HCW type                                  | Substrate                                                                                                                     | Removal efficiency %                                                                                                                                                                    | Comments                                                                                                                                                                                                                                                         | Ref.  |
|-----------------------------------------------------------------------------------------|-------------------------------------------|-------------------------------------------------------------------------------------------------------------------------------|-----------------------------------------------------------------------------------------------------------------------------------------------------------------------------------------|------------------------------------------------------------------------------------------------------------------------------------------------------------------------------------------------------------------------------------------------------------------|-------|
| BOD <sub>5</sub><br>COD<br>Ammonia-N                                                    | Saturated VF -<br>Free-drained<br>VF - HF | <ul style="list-style-type: none"> <li>•Crushed rock in saturated VF and HF.</li> <li>•Sand in a free-drained bed.</li> </ul> | 95, 84, and 78, respectively.                                                                                                                                                           | <ul style="list-style-type: none"> <li>➤ The system provided highly efficient organic matter and nitrogen removal.</li> <li>➤ Replace gravel with sand as filtration substrate in the second bed has a significant effect on ammonia nitrogen removal</li> </ul> | [92]  |
| BOD <sub>5</sub><br>Ammonia-N<br>TN<br>Escherichia coli                                 | VF-HF-VF                                  | Gravel<br>Wood mulch<br>Zeolite                                                                                               | Average removal percentages:<br>97, 99, 72, and ~100, respectively.                                                                                                                     | Non-traditional media have enhanced the removal of nitrogen and organic pollutants.                                                                                                                                                                              | [87]  |
| BOD<br>COD<br>TSS<br>Ammonia-N<br>Phosphate-P<br>faecal coliforms<br>faecal enterococci | VF-HF                                     | Basaltic gravel<br>Lapilli                                                                                                    | Average removal percentages:<br>Gravel-based system:<br>86, 79, 95, 88, 24, ~100, and ~100, respectively.<br>Lapilli-based system:<br>90, 77, 96, 85, 21, ~100, and ~100, respectively. | -                                                                                                                                                                                                                                                                | [135] |
| BOD<br>COD<br>TSS<br>Ammonium-N<br>TN                                                   | FWS-FWS- HF                               | -                                                                                                                             | Average removal percentages:<br>87, 58, 87, 75, 53, 33, 68, and 73, respectively.                                                                                                       | This system shows an efficient removal percentage for organic pollutants, heavy metals, and ammonia                                                                                                                                                              | [136] |

| TP<br>Zn<br>Cu                      |                                          |                                                             |                                                                                                                                                                                                                  | nitrogen but not for phosphate and nitrate nitrogen.                                                                                           |       |
|-------------------------------------|------------------------------------------|-------------------------------------------------------------|------------------------------------------------------------------------------------------------------------------------------------------------------------------------------------------------------------------|------------------------------------------------------------------------------------------------------------------------------------------------|-------|
| BOD <sub>5</sub><br>COD<br>TP       | HF-VF                                    |                                                             | The removal efficiencies for summer, autumn, winter, and spring were:<br>BOD <sub>5</sub> : 88, 85, 73, and 74, respectively.<br>COD: 89, 87, 83, and 86, respectively.<br>TP: 97, 98, 95, and 98, respectively. | The effect of seasonal changes on pollutant removal efficiency has been studied.<br>The removal percentage for TN in all systems was very low. | [137] |
| Sup Table S2 (cont.)                |                                          |                                                             |                                                                                                                                                                                                                  |                                                                                                                                                |       |
| Parameter                           | HCW type                                 | Substrate                                                   | Removal efficiency %                                                                                                                                                                                             | Comments                                                                                                                                       | Ref.  |
| COD<br>TSS<br>Ammonia-N<br>TN<br>TP | Towery HCW with three stages (HF-FWS-HF) | From bottom to top:<br>Washed gravel<br>Fine gravel<br>Soil | Average removal efficiency:<br>85, 89, 83, 83, and 64, respectively.                                                                                                                                             | The design shows an increase in the removal efficiency of the TN mainly by nitrification and denitrification mechanisms.                       | [85]  |
| COD<br>TN<br>TP                     | IVFCW                                    | Gravel                                                      | Removal efficiency<br>Mean of both systems:<br>61, 14, and 52, respectively.                                                                                                                                     | Low temperatures have a negative effect on nutrient removal.                                                                                   | [65]  |

|                                                                                 |       |                                                                      |                                                                                                                                                                                                             |                                                                                                                                                                                                                                           |      |
|---------------------------------------------------------------------------------|-------|----------------------------------------------------------------------|-------------------------------------------------------------------------------------------------------------------------------------------------------------------------------------------------------------|-------------------------------------------------------------------------------------------------------------------------------------------------------------------------------------------------------------------------------------------|------|
| BOD<br>COD<br>TSS<br>Ammonia-N<br>Nitrate-N<br>molybdate-reactive<br>phosphorus | ICW   | Sludge                                                               | For the new system<br>(one year of operation):<br>99, 97, ~100, 99, 94, and<br>99, respectively.<br>For the mature system<br>(five years of<br>operation): 95, 89, 97,<br>58, -11, and 34,<br>respectively. | In the long term, ICW<br>are efficient in<br>removing organic<br>pollutants (BOD, COD,<br>SS) and ammonia-<br>nitrogen from domestic<br>wastewater is better<br>than the removal<br>efficiency of nitrate-<br>nitrogen and<br>phosphorus. | [86] |
| COD<br>Ammonia-N<br>TN<br>TP                                                    | IVFCW | Waste bricks of<br>different sizes.                                  | Maximum removal:<br>67, 72, 57, and 92,<br>respectively.                                                                                                                                                    | The effect of different<br>hydraulic loads (0.15,<br>0.25, and 0.35 m/day)<br>has been studied.<br>High removal<br>percentage of TP.                                                                                                      | [89] |
| BOD <sub>5</sub><br>TSS<br>Ammonia-N<br>TP                                      | IHCW  | From bottom to<br>top:<br>Washed gravel<br>Pea gravel<br>Washed sand | 96, 97, 88, and 88,<br>respectively.                                                                                                                                                                        | The system is cost-<br>effective and does not<br>need any operational<br>energy inputs.<br>The system could be<br>feasible for single-<br>family use in<br>developing countries.                                                          | [63] |

BOD<sub>5</sub>; five-day Biochemical Oxygen Demand / COD; Chemical Oxygen Demand / TSS; Total suspended solids / TN; Total Nitrogen / TP; Total Phosphorus / TKN; Total Kjeldahl Nitrogen / VF; Vertical Flow / HF; Horizontal Flow
